# Supplementary material for: Attribution of growing season evapotranspiration variability considering snowmelt and vegetation changes in the arid alpine basins
Source: Copernicus journal article supplement (doi:10.5194/hess-2020-535), 2020-11-16
Supplement: Supplementary file [file hess-2020-535-AC1-supplement.pdf]

## Point-to-point responses:

Anonymous Referee #1:

The authors extend existing Budyko-type approaches for decomposing monthly ET variance (eg Liu et al 2019) amongst variances (average monthly deviation from an annual mean value) in underlying physical drivers of plant water use (e.g. rainfall). In particular, the model extension now accounts for variance in snowmelt fluxes and variance in vegetation cover. The manuscript is a logical extension of work previously published on the topic. However, I do have serious concerns with clarity of presentation in some parts of the manuscript, as well as the underlying “consistency” of the datasets used in the study (detailed in specific comments below).

**RESPONSE:** Thank you for the constructive comments. As for the “consistency” of the datasets, three variables cannot be directly observed at the basin scale, including evapotranspiration (ET), water storage change ( $\Delta S$ ) and snowmelt runoff ( $Q_m$ ), but can be indirectly estimated from different sources of datasets. In this study,  $\Delta S$  and  $Q_m$  were estimated by GLDAS data and the degree-day model, respectively. ET was obtained using the water balance equation based on the data of rainfall, runoff,  $\Delta S$  and  $Q_m$ . As you mentioned, GLDAS- $\Delta S$  may ignore the groundwater storage and lead to errors; however, it seemed that this is the best option. For example, GRACE data is superior for estimating  $\Delta S$ ; however, its coarse spatial resolution may result in even larger errors (please find detailed response in comment 5).

GLDAS has a snowmelt band, but we selected the degree-day model for  $Q_m$  because of the following aspects. On the one hand, large uncertainties exist in the snow data from GLDAS products. On the other hand, the major input data in the degree-day model we used are measured, which can provide more accurate results of snowmelt runoff. The previous studies using different methods indicated that our modelled  $Q_m$  is reliable (see comment 10).

Similarly, because of the uncertainties in the forcing data and modelling algorithms of GLDAS-ET, the estimated ET from the water balance equation is more reasonable (see comment 9). To validate the reliability of our ET, we conducted a comparison

between our estimated ET, ET\_GLDAS and ET from a dataset of “ground truth of land surface evapotranspiration at regional scale in the Heihe River Basin (2012-2016) ETmap Version 1.0”, respectively. The results showed that our estimated ET fits better with ETmap compared to GLDAS-ET, suggesting our estimated ET is acceptable.

Of course, in order to keep the “consistency” of the datasets, the abovementioned three variables from GLDAS can be used in the revised manuscript. However, we think, data reliability is more important than data consistency, especially for those data with large uncertainties. For any employed dataset, uncertainties would exist in the three estimated variables, a new section about the uncertainties will thus be added in the revised manuscript.

#### 4.5 Uncertainties

*Uncertainties from different sources may result in errors for this study. First, this study estimated  $\Delta S$  and  $Q_m$  with the GLDAS Noah land surface model and the degree-day model, respectively. Although the GLDAS  $\Delta S$  has been widely used in hydrological studies, it ignores the change in deep groundwater (Nie et al., 2016; Syed et al., 2008; Zhang et al., 2016), which may lead to errors in ET estimation based on water balance equation. But previous studies showed that the groundwater change in our study area is relatively small, and can thus be ignored. For example, Du et al. (2016) used the abcd model to quantitatively determine monthly variations of water balance for the sub-basins of Heihe River (including basins 3-5 in our study) and found that the soil water storage change have obvious effects on the monthly water balance, whilst the impact of monthly groundwater storage change is negligible. Furthermore, it has been found that any change in climate conditions and underlying basin characteristics will affect the contributions of heat balance components and cause temporal variations of DDF (Kuusisto, 1980; Ohmura, 2001). But previous studies indicated that there is no significant seasonal change in DDF in west China (Zhang et al., 2006); as such, it is acceptable to estimate snowmelt runoff using fixed DDF values in this study. In comparison, the contribution of snow meltwater to runoff ( $F_s$ ) was 12.9% in Basin 2 during 1971-2015 by using Spatial Processes in Hydrology model (Li et al., 2019), while  $F_s$  was 25% in Basin 3 from 2001 to 2012 based on*

geomorphology-based ecohydrological model (Li et al., 2018), <10% in Basin 6 during 1961-2006 by using SRM model (Gao et al., 2011). Our results indicated that the Fs in Basin 2, 3 and 6 were 14.8%, 24.5% and 6.7%, respectively, which were close to those from different models. Finally, the uncertainties of  $\Delta S$  and  $Q_m$  may lead to errors in ET estimation by water balance equation. To validate the reliability of our estimated ET, the comparison with  $ET_{map}$  from April to September during 2012-2014 was conducted (Figure S4). The results showed that our estimated ET fitted well with  $ET_{map}$  and basically fell around the 1:1 line, indicating ET estimated using water balance equation by considering the items of  $\Delta S$  and  $Q_m$  is acceptable.

Second, previous studies concluded that three main factors could be responsible for the variability of  $n$ , including underlying physical conditions (such as soil and topography characteristics) (Milly, 1994; Yang et al., 2007), climate seasonality (such as the temporal variability of rainfall, mismatch between water and energy) (Ning et al., 2017; Potter et al., 2005) and vegetation dynamics (Donohue et al., 2007; Zhang et al., 2001). On the short time scale, the changes in soil and topography are negligible and its impact on the variability of  $n$  can be ignored. In consequence, the factors, should be considered, are climate seasonality and vegetation dynamics. When parameterizing  $n$ , this study considered  $M$  but ignored climate seasonality since the covariance item between  $R$  and  $E_0$ , i.e.  $\varepsilon_1 \varepsilon_4 \text{cov}(R, E_0)$  in the attribution equation (13) can represent climate seasonality. In addition, human influence represented by parameter  $n$  on the water balance cannot be ignored, which remains further investigation.

The specific introduction of  $ET_{map}$  will be added in section 2.2-Data.

ET from dataset of “ground truth of land surface evapotranspiration at regional scale in the Heihe River Basin (2012-2016)  $ET_{map}$  Version 1.0” (hereafter “ $ET_{map}$ ”), was used to validate the reliability of our estimated ET. This dataset was published by National Tibetan Plateau Data Center. It was upscaled from 36 eddy covariance flux tower sites (65 site years) to the regional scale with five machine learning algorithms, and then applied to estimate ET for each grid cell ( $1 \text{ km} \times 1 \text{ km}$ ) across the Heihe River Basin each day over the period 2012–2016. It has been evaluated to have high

accuracy (Xu et al., 2018). Basins 3,4,5 in our study belongs to the headwater sub-basins of Heihe River, and our monthly ET from April to September during 2012-2014 was thus compared with  $ET_{map}$ .

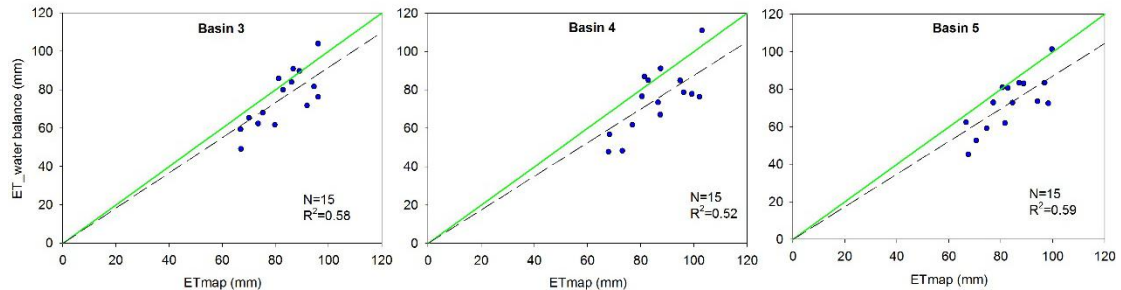

Figure S4. Comparison of monthly ET derived from water balance equation and  $ET_{map}$  during 2012-2014.

I also have a general question about the overall approach (that will probably reveal my own ignorance about these methods!). When I think about “variability” in ET, I first think about the year-by-year variation in the magnitude of ET in a particular month. However, if I’m understanding this manuscript correctly, the variability that is under consideration is the average of the monthly deviation of ET (or underlying drivers) from a long-term annual average. Is this interpretation correct? That is, in Equation 12 does  $\overline{ET}$  equal the long term annual mean, and does the index “i” in this case index all of the values for a given month? If so, this is somewhat confusing, as in the previous sections, “i” was used to index the month itself (not the collection of values for a given month). I ask because I can imagine another form of “variance” that is more in line with my expectations, but i’m not entirely sure how it should be interpreted with respect to the variance I described above (or if it’s even functionally different from what i described above): This is where  $\overline{ET}$  is the long term monthly mean of that particular variable (not the annual mean), and where the variance is the variance of the annual realization of that variable about it’s long term monthly mean. I think the author’s framework addresses the former definition, but am not sure. Is there a significant difference between these two interpretations? If so, what are the different types of questions that you might address with one approach or the other? Additionally, in the case of the first description (average deviation in a given month from a long term annual mean), why is this simply not referred to as

seasonality? Presumably this form of “variability” can’t be used to address questions relating to long term trends, etc. I apologize if this long-winded question is a bit convoluted; I’m wrestling with some of these concepts for the first time! Thanks for any additional clarification.

**RESPONSE:** The unbiased sample variance in equation 12 is estimated by the concept of statistics, not derived by previous studies or us. I would like to clarify the specific calculation as follows: in this study, with data of growing season (April to September) during 2001-2014, the sample size was 6 months/year×14 years=84 months, i.e. N=84 in equation 12. The calculation regarded all the months as a group or a time series of data, and did not conduct calculation for each calendar month. In consequence,  $i$  is used to index time series of month from 1 to N.  $\overline{ET}$  is the long-term average of ET for 84 months. As such, one time series of data can only had one variance. It is known that a small test set size leads to a large bias in the estimate of the true variance between design sets (Geng et al., 1979; Wickenberg-Bolin et al., 2006). Comparing with conducting calculation for each calendar month, the calculation by us and other researchers (Liu et al., 2019; Ye et al., 2015; Zeng and Cai, 2015; Zeng and Cai, 2016) can obtain larger sample size. In fact, our variance can also refer to the ET seasonality, as to it reflect the intra-annual change in ET. In the revised version, we will explain the related variables more clearly:

*The unbiased sample variance of ET ( $\sigma_{ET}^2$ ) is defined as:*

$$\sigma_{ET}^2 = \frac{1}{N-1} \sum_{i=1}^N (ET_i - \overline{ET})^2 = \frac{1}{N-1} \sum_{i=1}^N (\Delta ET_i)^2 \quad (12)$$

*where  $\overline{ET}$  is the long term monthly mean of ET. N is the sample size, it equals 84 in this study (6 months/year×14 years=84 months).  $i$  is used to index time series of month from 1 to N.*

COMMENTS:

1) It would be helpful if the authors included units when introducing terms; e.g. What is “M” and what are its units?

**RESPONSE:** The units of related variables will be added in the revised version. M is vegetation coverage and is dimensionless. “M” will be introduced in more details in Line 140:

*The monthly normalized difference vegetation index (NDVI) at a spatial resolution of 1km from the MODIS MOD13A3.006 product was used to assess vegetation coverage (M), which can be calculated from the method of Yang et al. (2009):*

$$M = \frac{NDVI - NDVI_{min}}{NDVI_{max} - NDVI_{min}}$$

*where  $NDVI_{max}$  and  $NDVI_{min}$  are the NDVI values of dense forest (0.80) and bare soil (0.05).*

2) Lines 53 - 65: veg change and disturbance?

**RESPONSE:** Vegetation change is more suitable. Vegetation change is the final results no matter it is disturbed by any environmental change.

3) Lines 56-57: Why the “but”?

**RESPONSE:** With the given precipitation, if vegetation condition is improved, the transpiration will increase to lead to higher ET. According to the water balance equation, the increasing ET will result in decreasing runoff, i.e., the ratio of Qr to P. To clarify this, it was replaced with “and” in this version.

4) Lines 67-68: What do the authors mean by “which has been the foundation for decomposing ET or runoff variance and is expressed as:”. What has been the foundation for decomposing ET? Are the authors saying that “snowmelt influence has been the foundation for decomposing ET”? I’m not sure what that means.

**RESPONSE:** The short-term water balance equation was the foundation of decomposing ET/or runoff variance. Its general form can be expressed as:  $P=ET+Qr+\Delta S$ . But this equation is not suitable for the regions where the hydrology is highly dependent on winter mountain snowpack and spring snowmelt runoff. Thus, the water balance equation should be modified to consider the impacts of snowmelt on runoff in short-term time scale. To clarify this, it will be revised as:

*The short-term water balance equation was the foundation of decomposing ET/or runoff variance. Its general form can be expressed as:*

$$P=ET+Qr+\Delta S \quad (1)$$

*where P, including liquid (rainfall) and solid (snowfall) precipitation, is the total water source of hydrological cycle. But this equation is not suitable for the regions where the land surface hydrology is highly dependent on winter mountain snowpack and spring snowmelt runoff. It has been reported that annual  $Qr$  originating from snowmelt accounted for 20%-70% of the total runoff across the world, including west United States (Huning and AghaKouchak, 2018), coastal areas of Europe (Barnett et al., 2005), west China (Li et al., 2019b), northwest India (Maurya et al., 2018), south of the Hindu Kush (Ragetti et al., 2015), and high-mountain Asia (Qin et al., 2020). In these regions, the mountain snowpack serves as a natural reservoir that storing cold-season P to meet the warm-season water demand (Qin et al., 2020; Stewart, 2009). Thus, the water balance equation should be modified to consider the impacts of snowmelt on runoff in short-term time scale.*

5) Lines 131-132: Delta S is computed as difference in GLDAS soil moisture down to 2m between months. However, the authors explicitly refer to groundwater as being important with respect to storage change impacts on ET in their introduction. Can these shallow soil moisture measurements reliably represent total storage changes in the catchment? Presumably, in these semi-arid basins, significant storage dynamics occur below 2m depth, both in the deep unsaturated zone and deeper groundwater. What are the consequences of this for the author's findings? Will the impact of storage changes be significantly underestimated?

**RESPONSE:** Yes, GLDAS- $\Delta S$  ignores the change in groundwater. For groundwater change, the best option is GRACE- $\Delta S$ ; however, it is not applicable in the study area since the low spatial resolution of GRACE ( $1^\circ \times 1^\circ$ ) would lead to large errors in small basins. Instead, GLDAS- $\Delta S$  is appropriate in representing the basin-scale water storage change. First, GLDAS has high spatial resolution of  $0.25^\circ \times 0.25^\circ$ . Second, the groundwater change in west China is small and can be ignored. Specifically, Du et al. (2016) used the abcd model to quantitatively determine monthly variations of water

balance for the sub-basins of Heihe River (including basins 3-5 in our study ) and found that soil water storage change have effects on monthly water balance, whilst the impact of monthly groundwater storage change is negligible. To clarify the uncertainties, a new section will be added in the revised manuscript. The details can be found at the beginning.

6) Line 138: This seems important. Some overview of the Yang 2009 method would be helpful.

**RESPONSE:** M” will be introduced in more details and the specific revision can be found in comment 1.

7) Line 142: What is F? Assuming it’s percent forest cover. It’s unclear why we need this, and its relationship to M.

**RESPONSE:** F is percent forest cover. It was used to explain the finding of “better vegetation condition, especially larger forest cover, could result in stronger impacts on ET variance” in Line 302-306. In your 20<sup>th</sup> comment, you think that this explanation is just a restatement of the finding. We will thus delete the related text of F in Line 141-144 and Line 304-306, and will give discussion according to your suggestion in the 20<sup>th</sup> comment.

8) Line 157: Perhaps useful to point out the parallel to Zeng and Cai, a further elaboration of “effective” precipitation. In their case, this included precip and deltaS. Here, snowmelt is added.

**RESPONSE:** This part will be revised as:

$$ET = \frac{P_e \times E_0}{(P_e^n + E_0^n)^{1/n}} \quad (3)$$

*where n is the controlling parameter of the Choudhury–Yang equation. P<sub>e</sub> is the total available water supply for ET. In previous studies, P<sub>e</sub> included P and ΔS (P<sub>e</sub>=P-ΔS) on finer time scale. But snowmelt runoff should also be considered in the snow-dependent basins.*

9) Line 162: So, ET is obtained as the residual of a mass balance, and then this nonlinear equation is solved for “n” for each value of ET? It seems strange to me not



to use the GLDAS-estimated ET (which is available), given that this is how Delta S is specified.

**RESPONSE:** Yes, your understanding of the calculation of ET and n is right. When we chose the datasets used in our manuscript, the observed data was first choice. However, it is hard to obtain the observed ET at catchment scale. GLDAS-ET is indeed available. But it has been found that GLDAS products failed to reproduce the water balance-based annual ET time series, which was considered as measured ET, over most basins in China (Bai and Liu, 2018). The errors may come from the uncertainty of its forcing data and model algorithms. On one hand, the precipitation data come from the Princeton Global Forcing dataset, which is a reanalysis dataset generated from a climate model. The spatial resolution is only  $2^{\circ} \times 2^{\circ}$  (Sheffield et al., 2006). The low spatial resolution of forcing data should surely affect ET accuracy, especially in small basins. On the other hand, GLDAS products used Penman-Monteith equation to estimate ET. In this equation, the soil water stress factor is critically important for plant transpiration suppression. However, this factor was implicitly considered by GLDAS products with the vapor pressure deficit (VPD). It is potentially problematic to use VPD to reflect soil water stress for transpiration, especially in drier regions. Some other promising recently released high-resolution ET products, such as GLEAM v3.2 and CLSM v2.0 also have similar problems. In the introduction section, we have illustrated that the short-term water balance equation was the foundation of decomposing ET/or runoff variance (see comment 4). In many present studies of Budyko, water balance equation is also usually used to obtain the ET values (Liu et al., 2018; Wang, 2012a; Yang et al., 2009) . Further, ET obtained from water balance equation was usually considered as “observed ET” and used to validate modeled ET(Bai and Liu, 2018; Liu et al., 2016). The advantage of this method is that the water balance terms except for ET come from the direct observations. In our manuscript, except for observed rainfall and runoff items, the water balance equation also includes snowmelt ( $Q_r$ ) and  $\Delta S$  items. Even  $Q_r$  and  $\Delta S$  do not directly observed, the key parameters of  $Q_r$  model is calculated using measured data; further, GLDAS- $\Delta S$  is also acceptable, which has been explained in comment 5. To sum up, we think ET obtained from water balance equation should be relatively

reasonable compared with global ET products.

To validate the reliability of our ET, we conducted a comparison between our estimated ET, ET\_GLDAS and ET from a dataset of “ground truth of land surface evapotranspiration at regional scale in the Heihe River Basin (2012-2016) ETmap Version 1.0”, respectively. This ET dataset was published by National Tibetan Plateau Data Center. It was upscaled from 36 eddy covariance flux tower sites (65 site years) to the regional scale with five machine learning algorithms, and then applied to estimate ET for each grid cell (1 km × 1 km) across the Heihe River Basin each day over the period 2012–2016. It has been evaluated to have high accuracy Basins 3,4,5 in our study belongs to the headwater sub-basins of Heihe River, and our monthly ET from April to September during 2012-2014 was thus compared with ET<sub>map</sub> (see Figure S4). The results showed that our estimated ET fits better with ET<sub>map</sub> compared to GLDAS-ET and basically fell around the 1:1 line. Moreover, ET\_GLDAS values is obviously smaller than ET<sub>map</sub>. Even in the July and August, monthly ET\_GLDAS is less than 60 mm, which is unreasonable in this region. Thus, it can be concluded that our estimated ET by water balance equation is acceptable. The details can be found at the beginning.

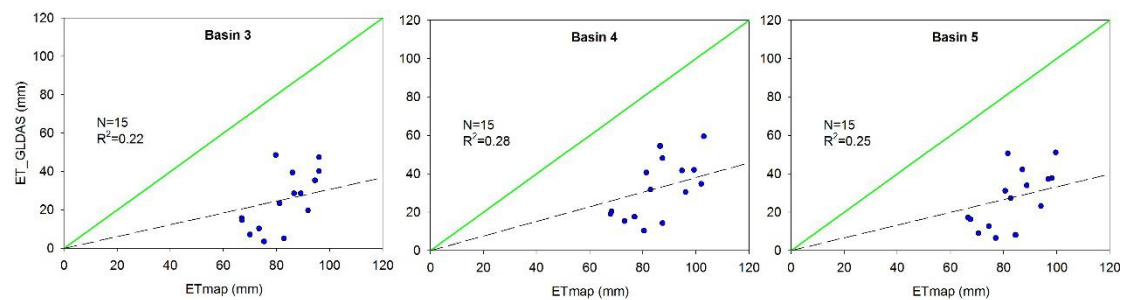

Comparison of monthly ET derived from GLDAS product and ET<sub>map</sub> during 2012-2014.

10) Line 170: GLDAS specifically has a snowmelt band. Why not use that, given using it for other aspects of the analysis? Might be more consistent?

**RESPONSE:** The snow model used by GLDAS2-Noah is the Noah land surface model, which has a single-layer snow scheme. And it is forced using the Princeton meteorological forcing dataset. It has been found that there remains substantial

uncertainty about the representation of snow on the ground in many reanalysis and GLDAS products, as evidenced by the wide spread of snow water equivalent and snow depth simulations in such systems (e.g., (Broxton et al., 2016; Mudryk et al., 2015)). For example, GLDAS products underestimate forcing data, including precipitation and snow season temperature, which undeniably contributes to these products having low snow water equivalent. Furthermore, GLDAS products that predict more snow ablation at near-freezing temperatures have larger underestimates of snow water equivalent. In contrast, the major input data in the degree-day model we used are measured. Specifically, the temperature data comes from meteorological stations and the degree-day factor is surveyed by difference GPS for each basin. Even the snow cover data is obtained from remote sensing product, its higher spatial resolution (1km×1km) could reflect slight change of snow cover area and lead to relatively accurate modelling of snowmelt runoff.

We also compared our snowmelt runoff values with other studies. In comparison, the contribution of snow meltwater to runoff (Fs) was 12.9% in Basin 2 during 1971-2015 by using Spatial Processes in Hydrology model(Li et al., 2019), while Fs was 25% in Basin 3 from 2001 to 2012 based on geomorphology-based ecohydrological model (Li et al., 2018), <10% in Basin 6 during 1961-2006 by using SRM model (Gao et al., 2011). Our results indicated that the Fs in Basin 2, 3 and 6 were 14.8%, 24.5% and 6.7%, respectively, which were close to those from different models. It can be concluded that our snowmelt runoff value is acceptable. The details can be found at the beginning.

11) Line 180: The authors state March to July are the major snowmelt months. Why then do the authors then only perform their analysis April to July? Also, why not just apply the analysis for all months of the year? What is the purpose of leaving out the rest of the year?

**RESPONSE:** In this study, we focused on the ET variability in growing season, which is from April to September in this region. Thus, the beginning of snowmelt months was set as April. One of the major issues we care about is quantifying the contributions of vegetation change on ET variance on finer time scale by developing

the relationship between Budyko controlling parameter  $n$  and vegetation coverage  $M$  on monthly scale. At first, we explored the relationship between  $n$  and  $M$  for all months of the year, but their relationship was not significant in most basins. We found that the abnormal points in non-growing season influenced this relationship, which means the impact of vegetation on ET variance in non-growing season is very weak. Thus, in order to decrease the attribution error, we focused on the analysis in growing season.

12) Line 186: “ $M$ ” has not been sufficiently defined leading up to this section.

**RESPONSE:** the specific revision of “ $M$ ” can be found in comment 1.

13) Line 194: Is there any basis (e.g. citation) for this functional dependence? While I agree that vegetation will play a role in determining ‘ $n$ ’, it’s also true that ‘ $n$ ’ likely depends on other catchment features, such as soil water storage capacity. I guess the question, then, is whether these other drivers can be assumed constant through time, and thus somehow justifiably lumped into the fitted constant parameter ‘ $a$ ’ in Equation 8. Can the authors confirm that vegetation is likely the only non-static component of the exponent ‘ $n$ ’ through a brief review of such mechanistic models? The first one that comes to mind is Porporato et al (2004); though I’m not sure the functional form is identical to Equation 3. Porporato, Amilcare, Edoardo Daly, and Ignacio RodriguezIturbe. "Soil water balance and ecosystem response to climate change." *The American Naturalist* 164.5 (2004): 625-632.

**RESPONSE:** Except for our previous study in HESS (Ning et al, 2017), Yang et al. (2009) in WRR and Liu et al. (2018) in HESS also used power function to fit the relationship between controlling parameter and vegetation coverage ( $M$ ). These works will be cited in our revised manuscript.

Except for vegetation condition, other factors, such as soil property, topography and climate seasonality will also influence parameter controlling parameter. But multicollinearity may occur when the explanatory variables are intercorrelated, which will, in turn, induce a series of problems. For example, the effects of individual explanatory variables may not be precisely estimated and the regression coefficients

may become highly unstable (Mjelde et al., 1991). Therefore, it is necessary to check the interactions between explanatory variables and select independent variables when developing expressions of the controlling parameters. This work has been done in our previous study: “Ning, Tingting, Zhou, Sha, et al., 2019. Interaction of vegetation, climate and topography on evapotranspiration modelling at different time scales within the Budyko framework. *Agricultural and Forest Meteorology*, 275: 59-68”. The changes in landform, such as topography or soils, are gentle and can be ignored. Therefore, we focused on the interactions among vegetation coverage(M), climate seasonality index (SAI). We found that, on annual scale, M and SAI were significantly related to controlling parameter, while being independent from each other; in consequence, both of them should be parameterized into the Budyko model. In this study, we only considered M while ignored SAI when parameterizing  $n$  because the covariance item between rainfall and potential evapotranspiration, i.e.  $\varepsilon_1 \varepsilon_4 \text{COV}(R, E_0)$ , in equation (13) can represent the climate seasonality. According to your suggestion, a brief review about the impact factors of Budyko controlling parameter will be added in the discussion of revised manuscript. The details can be found at the beginning of this response.

14) Line 216: It’s probably obvious to most folks, but the authors should still probably define the overbar as some long term mean. Also, would  $\bar{n}$  also equal the longterm mean ET from Equation 3? Probably best to try to stay consistent with notation if possible.

**RESPONSE:**  $\overline{ET}$  will be defined as “long-term mean of monthly ET” in the revised manuscript. Initially, the Choudhury-Yang equation, i.e. equation (3), was derived on long-term scale, thus ET in this equation represented ET on the long-term scale, and it will be revised as  $\overline{ET}$  in the revised manuscript.

15) Line 227: What is the function “F”? It is not defined. It is referred to as a “factor” in Line 233. Also, what is the underscore notation used here e.g. “R\_M”. Presumably these correspond to the terms in Equation 14, but that’s not very clear, and the notation is not explained or defined.

**RESPONSE:** Sorry for our carelessness. In the revised manuscript, “F” will be

defined as “the individual contributions of each factor”; each two factors linked by underscore represent the interaction effects between them.

16) Line 240 - 244: This is an unexpected addition that I don't fully understand. Are the authors analyzing results for different representations of effective precipitation? If so, why, and where was this motivated? I don't think it was outlined in the methods. It looks like the authors use 3 different forms of increasing complexity; precip alone; precip plus snowmelt; precip plus snowmelt plus storage differential.

**RESPONSE:** Yes, Figure 3 presents the water balance in the monthly scale of all the study basins in the Budyko's framework with four different computations of aridity index or ET ratio: i.  $ET=R-Q_r$  when  $R$  is considered as water supply ( $Pe=R$ ); ii.  $ET=R-\Delta S-Q_r$  when  $R-\Delta S$  is considered as water supply ( $Pe=R-\Delta S$ ); iii.  $ET=R+Q_m-Q_r$  when  $R+Q_m$  is considered as water supply ( $Pe=R+Q_m$ ); iv.  $ET=R-\Delta S+Q_m-Q_r$  when  $R-\Delta S+Q_m$  is considered as water supply ( $Pe=R-\Delta S+Q_m$ ).

The motivation is: the Budyko framework was originally derived on long-term scale. Then it was gradually extended to characterize and predict the interannual variability of ET and the runoff fluxes on short time scales (including interannual and monthly scales). Some studies also showed that the Budyko framework was not suitable to represent ET variation on short time scales, because of the data points drew by ET ratio and dryness index beyond the two limit curves of Budyko framework (Chen et al., 2013; Du et al., 2016; Wang, 2012b). These studies found that ignoring  $\Delta S$  is the main reason (see Figure 11 by (Du et al., 2016); Figure 3 by (Chen et al., 2013)). Thus, validating the feasibility of using Budyko equation for variability of ET on the short time scale is the foundation.

Considering different combinations of water supply to ET is the main method for validation. In this study, except for  $\Delta S$ , snowmelt runoff ( $Q_m$ ) is an important item of monthly water balance equation. Four combinations of water supply were thus assumed to prove the importance of considering  $\Delta S$  and  $Q_m$  into Budyko framework on monthly scale in the original manuscript. In this version, to avoid confusion, we only considered three combinations of water supply, i.e.,  $Pe=R$ ,  $Pe=R-\Delta S$  and  $Pe=R-\Delta S+Q_m$ .

The motivations will be added and the related expression will be revised. You pointed out that the operation of this part was not outlined in the methods. As they are used to show the distribution of data points of  $E_0/P_e$  and  $ET/P_e$  under the Budyko framework, the figure is enough even without description in the methods.

#### *4.1 The effects of monthly storage change and snowmelt runoff in the Budyko framework*

*The Budyko framework is usually used for analyses of long-term average catchment water balance; however, it was employed for the interpretation of the monthly variability of the water balance in this study. Thus, it's very necessary to validate the feasibility of Budyko equation for monthly variability. Furthermore, the impact of  $\Delta S$  on the representation of Budyko framework on finer time scale has assessed by several studies (Chen et al., 2013; Du et al., 2016; Liu et al., 2019; Zeng and Cai, 2015). However, the impact of  $Q_m$  and its combined effects with  $\Delta S$  in snowmelt-dependent basins are mostly ignored. Therefore, we present the water balance in the monthly scale of six basins in the Budyko's framework with three different computations of aridity index ( $\phi=E_0/P_e$ ) or ET ratio ( $ET/P_e$ ) in Figure 3. In Figure 3a,  $ET=R-Q_r$  when  $R$  is considered as water supply, i.e.,  $P_e=R$ . The points of monthly ET ratio and aridity index in April and May were well below Budyko curves in 6 basins; monthly ET ratio was even negative in several year, which means the local rain are not the only sources of ET in this area, especially in spring. In Figure 3b,  $ET=R-\Delta S-Q_r$  with  $P_e=R-\Delta S$ . Compared with figure 3a, the way-off points in April and May were improved to a certain extent but negative points still existed, suggesting that except for  $R$ ,  $\Delta S$  also play a significant role in maintaining spring ET, but the variability of ET cannot be completely explained by these two variables. In Figure 3c,  $ET=R-\Delta S+Q_m-Q_r$  with  $P_e=R-\Delta S+Q_m$ . Compared to the points in Figures 3a-b, all points focused on Budyko's curves more closely in each basin when  $P_e=R+Q_m-\Delta S$  (Figure 3c). From this comparison, it can be concluded that the Budyko framework is applicable to the monthly scale in snowmelt-dependent basins, if the water supply is described accurately by considering  $\Delta S$  and  $Q_m$ .*

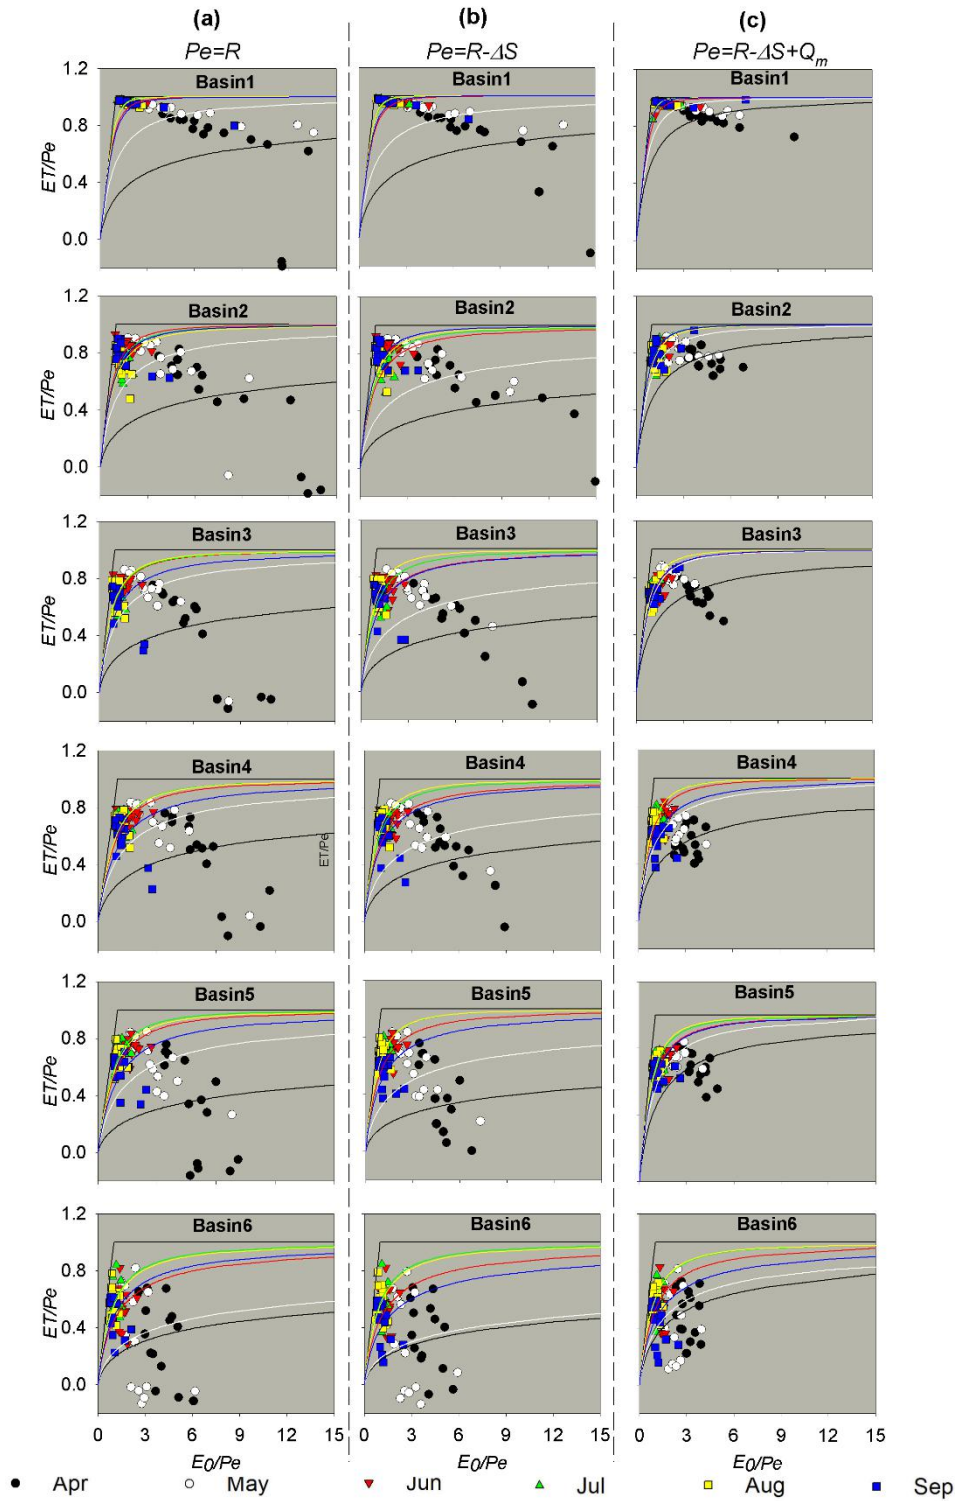

Figure 3 Plots for aridity index vs. evapotranspiration index scaled by available water supply for monthly series in growing season. Total water availability is (a)  $R$ , (b)  $R-\Delta S$  and (c)  $R-\Delta S + Q_m$ . The  $n$  value for each Budyko curve is fitted by long-term averaged monthly data.

17) Figure 3: I'm also a bit confused on this figure. Should it be the case that the



points fall on the correspondingly colored curves? Were the curves generated by fitting to the points? Why should a single curve be fit across the ensemble of ET/Pe values for each month? Isn't it reasonable to expect that even the same month in different years will have different values for "n" due to interannual variability in factors that determine "n"? (this relates to my general question about timescales at the start of the review).

**RESPONSE:** Theoretically, the points should fall on the Budyko curves. But deviations from the Budyko curve have been detected in many previous studies. In addition to climate conditions, other variables including vegetation, soil, topography and climate seasonality, also influence the variability of regional water balances (Wang, 2012b; Yang et al., 2007). All these factors can be encoded into the controlling parameter of the Budyko equations. In this study, the vegetation coverage was chosen to explain the monthly variability of n, which was obtained by equation 5 for each month. To make the figure clearer, the mean annual n for each month was used to draw the Budyko curve. This operation was also adopted by many previous studies (Du et al., 2016; Liu et al., 2018; Ning et al., 2017).

18) Line 245: Can the authors explain this statement? I don't understand the significance. Is this just to say that if you don't account for all potential fluxes into the rooting zone, the mass balance might be incorrect?

**RESPONSE:** Yes. In order to obtain the right ET values, the mass balance should consider all potential fluxes. If this is not done, the abnormal data point will be observed in Figure 3, such as the negative monthly ET ratio in Figure 3a-b.

19) Line 261: Is it true that  $n\Delta S$  is expected to be small or zero if there are no interannual storage changes?

**RESPONSE:** We checked the original data and recalculated the mean and the standard deviation values of  $\Delta S$  and confirmed this result is correct. Here, what we found is that the intra-annual changes of water storage is relatively large, but its mean monthly value was small. This is because  $\Delta S$  in some months is positive but in some months is negative.

20) Line 304 - 306: I don't think this is an explanation; it's a restatement of the finding that vegetation has a larger impact on ET variance when water is not limiting. The authors still have not answered (or ventured a hypothesis) as to why ET is more sensitive to variability in vegetation cover when water is not a limiting factor? I can think of a couple of vague hypotheses, but would love to see a bit more discussion from the authors on this point; it seems central to the paper.

**RESPONSE:** We agreed with you. The related text of F will be deleted. We will give discussion according to your suggestion in the revised manuscript:

*C(M) showed an increasing trend from 0.5% to 9.5% with the decreasing  $\phi$ , implying that the contribution of vegetation change to ET variance was larger in relatively humid basin. It can be explained that transpiration is more sensitive to vegetation change, and thus the higher vegetation coverage could increase the proportion of transpiration to ET in humid regions (Niu et al., 2019; Zhang et al., 2020). The Budyko hypothesis stated that change in ET is controlled by change in available energy when water supply is not a limiting factor under humid conditions (Budyko, 1974; Yang et al., 2006). The increasing M results in the reallocation of available energy between canopy and soil. Specifically, more energy is consumed by canopy thus increases transpiration. Further, Previous studies have found that ET differs greatly among species, because of the difference in canopy roughness, the timing of physiological functioning, water holding capacity of the soil and rooting depth of the vegetation (Baldocchi et al., 2004; Bruemmer et al., 2012). Generally, forest had larger ET than grassland (Ma et al., 2020; Zha et al., 2010). The fraction of forest area is relatively high and thus lead to the higher contributions to ET for whole basin in the humid region. For example, Wei et al. (2018) showed that the global average variation in the annual  $Q_r$  due to the vegetation cover change was  $30.7 \pm 22.5\%$  in forest-dominated regions on long-term scales, which was higher than our results because of their higher forest cover.*

21) Line 313: A downward trend with respect to increasing aridity? It would be helpful if the authors continued to explicitly state the dependent and independent

variables when talking about trends.

**RESPONSE:** This part will be revised as:

*Similar as  $C(R)$ ,  $C(Q_m)$  showed a downward trend with the decreasing  $\phi$ , ranging from 2.9% to 0.4%.*

22) Line 318: Elasticity has not been defined up to this point. This is an important concept that the authors should explain more clearly around Equations 13 and 14.

**RESPONSE:**  $\varepsilon$  in equations 13 and 14 is the partial differential coefficients of ET to each variable, not the elasticity coefficients. We will define it in equation (11) where it firstly appears.

23) Line 318: I think it would be very helpful if the authors more explicitly described this idea that the contribution is dependent on both the magnitude of the variance of the driving variable as well as the elasticity.

**RESPONSE:** This part will be revised as:

*It can be explained that the contribution of each variable to  $\sigma_{ET}^2$  was not only the product of the partial differential coefficients, but also relied on its variance value according to equation 13. Specifically, the partial differential coefficients of 0.1 for a variable means that a 10% change in that variable may result in a change in ET by 1%, which can only reflect the theoretical contribution of each variable. By multiplying the variance value, the actual contribution of each variable could be obtained.*

24) Lines 320 - 324: The model developed here cannot speak to these non-stationary changes though, correct? The analysis here is only pertinent to intra-annual variability attribution, as the variance under consideration is that of the average of the monthly deviation from an annual mean, as opposed to the year-to-year variance of a particular variable about its long term monthly mean? Again, this relates to my timescale question at the start of the review.

**RESPONSE:** The analysis of this study is only pertinent to intra-annual variability attribution. But it can be used to represent nonstationary changes, but just limited to

intra-annual scale. Specifically, the intra-annual variability of ET is related to the intra-annual variability of related factor. Here, we emphasized that the climate warming shifted the timing of snowmelt earlier in the spring in the Qilian Mountains, which resulted in increased soil moisture and a greater proportion of Qm to ET. The shifting of timing of snowmelt earlier in the spring referred to the intra-annual variability of snowmelt period. Thus, we thought it is reasonable.

25) Line 330: What is a “good” vegetation condition?

**RESPONSE:** This expression is indeed improper. Thus “good vegetation condition” will be revised as “higher vegetation coverage”.

26) Line 392: “Corrected” I assume should be “correlated”?

**RESPONSE:** We are so sorry for our carelessness. “correlated” is right.

#### **References:**

- Bai, P.,&Liu, X.M., 2018. Intercomparison and evaluation of three global high-resolution evapotranspiration products across China. *Journal of Hydrology*, 566: 743-755.
- Baldocchi, D.D., Xu, L.K.,&Kiang, N., 2004. How plant functional-type, weather, seasonal drought, and soil physical properties alter water and energy fluxes of an oak-grass savanna and an annual grassland. *Agricultural and Forest Meteorology*, 123(1-2): 13-39.
- Broxton, P.D., Zeng, X.,&Dawson, N., 2016. Why Do Global Reanalyses and Land Data Assimilation Products Underestimate Snow Water Equivalent? *Journal of Hydrometeorology*, 17(11): 2743-2761.
- Bruemmer, C., Black, T.A., Jassal, R.S., Grant, N.J., Spittlehouse, D.L., Chen, B., Nesic, Z., Amiro, B.D., Arain, M.A., Barr, A.G., Bourque, C.P.A., Coursolle, C., Dunn, A.L., Flanagan, L.B., Humphreys, E.R., Lafleur, P.M., Margolis, H.A., McCaughey, J.H.,&Wofsy, S.C., 2012. How climate and vegetation type influence evapotranspiration and water use efficiency in Canadian forest, peatland and grassland ecosystems. *Agricultural and Forest Meteorology*, 153: 14-30.
- Budyko, M.I., 1974. *Climate and life*. Academic, New York.
- Chen, X., Alimohammadi, N.,&Wang, D., 2013. Modeling interannual variability of seasonal evaporation and storage change based on the extended Budyko framework. *Water Resources Research*, 49(9): 6067-6078.
- Du, C., Sun, F., Yu, J., Liu, X.,&Chen, Y., 2016. New interpretation of the role of water balance in an extended Budyko hypothesis in arid regions. *Hydrology and Earth System Sciences*, 20(1): 393-409.
- Gao, X., Zhang, S., Ye, B.,&Gao, H., 2011. Recent changes of glacier runoff in the Hexi Inland river basin. *Advances in Water Science (In Chinese)*, 22(3): 344-350.
- Geng, S., Wang, W.J.,&Miller, C., 1979. SMALL SAMPLE-SIZE COMPARISONS OF TESTS FOR HOMOGENEITY OF VARIANCES BY MONTE-CARLO. *Communications in Statistics Part*

- B-Simulation and Computation*, 8(4): 379-389.
- Kuusisto, E., 1980. ON THE VALUES AND VARIABILITY OF DEGREE-DAY MELTING FACTOR IN FINLAND. *Nordic Hydrology*, 11(5): 235-242.
- Li, H., Zhao, Q., Wu, J., Ding, Y., Qin, J., Wei, H., & Zeng, D., 2019. Quantitative simulation of the runoff components and its variation characteristics in the upstream of the Shule River. *Journal of Glaciology and Geocryology (in Chinese)*, 41(4): 907-917.
- Li, X., Cheng, G., Ge, Y., Li, H., Han, F., Hu, X., Tian, W., Tian, Y., Pan, X., Nian, Y., Zhang, Y., Ran, Y., Zheng, Y., Gao, B., Yang, D., Zheng, C., Wang, X., Liu, S., & Cai, X., 2018. Hydrological Cycle in the Heihe River Basin and Its Implication for Water Resource Management in Endorheic Basins. *Journal of Geophysical Research-Atmospheres*, 123(2): 890-914.
- Liu, J., Zhang, Q., Feng, S., Gu, X., Singh, V.P., & Sun, P., 2019. Global Attribution of Runoff Variance Across Multiple Timescales. *Journal of Geophysical Research-Atmospheres*, 124(24): 13962-13974.
- Liu, J., Zhang, Q., Singh, V.P., Song, C., Zhang, Y., & Sun, P., 2018. Hydrological effects of climate variability and vegetation dynamics on annual fluvial water balance at global large river basins. *Hydrology & Earth System Sciences*, 22: 4047-4060.
- Liu, W.B., Wang, L., Zhou, J., Li, Y.Z., Sun, F.B., Fu, G.B., Li, X.P., & Sang, Y.F., 2016. A worldwide evaluation of basin-scale evapotranspiration estimates against the water balance method. *Journal of Hydrology*, 538: 82-95.
- Ma, S., Eichelmann, E., Wolf, S., Rey-Sanchez, C., & Baldocchi, D.D., 2020. Transpiration and evaporation in a Californian oak-grass savanna: Field measurements and partitioning model results. *Agricultural and Forest Meteorology*, 295.
- Mjelde, J.W., Cothren, J.T., Rister, M.E., Hons, F.M., Coffman, C.G., Shumway, C.R., & Lemon, R.G., 1991. Integrating data from various field experiments: the case of corn in Texas. *Journal of Production Agriculture*, 4(1): 139.
- Mudryk, L.R., Derksen, C., Kushner, P.J., & Brown, R., 2015. Characterization of Northern Hemisphere Snow Water Equivalent Datasets, 1981-2010. *Journal of Climate*, 28(20): 8037-8051.
- Nie, N., Zhang, W.C., Zhang, Z.J., Guo, H.D., & Ishwaran, N., 2016. Reconstructed Terrestrial Water Storage Change (Delta TWS) from 1948 to 2012 over the Amazon Basin with the Latest GRACE and GLDAS Products. *Water Resources Management*, 30(1): 279-294.
- Ning, T., Li, Z., & Liu, W., 2017. Vegetation dynamics and climate seasonality jointly control the interannual catchment water balance in the Loess Plateau under the Budyko framework. *Hydrology and Earth System Sciences*, 21(3): 1515-1526.
- Niu, Z., He, H., Zhu, G., Ren, X., Zhang, L., Zhang, K., Yu, G., Ge, R., Li, P., Zeng, N., & Zhu, X., 2019. An increasing trend in the ratio of transpiration to total terrestrial evapotranspiration in China from 1982 to 2015 caused by greening and warming. *Agricultural and Forest Meteorology*, 279.
- Ohmura, A., 2001. Physical basis for the temperature-based melt-index method. *Journal of Applied Meteorology*, 40(4): 753-761.
- Sheffield, J., Goteti, G., & Wood, E.F., 2006. Development of a 50-year high-resolution global dataset of meteorological forcings for land surface modeling. *Journal of Climate*, 19(13): 3088-3111.
- Syed, T.H., Famiglietti, J.S., Rodell, M., Chen, J., & Wilson, C.R., 2008. Analysis of terrestrial water

- storage changes from GRACE and GLDAS. *Water Resources Research*, 44(2).
- Wang, D., 2012a. Evaluating interannual water storage changes at watersheds in Illinois based on long-term soil moisture and groundwater level data. *Water Resources Research*, 48.
- Wang, D., 2012b. Evaluating interannual water storage changes at watersheds in Illinois based on long-term soil moisture and groundwater level data. *Water Resources Research*, 48: W03502.
- Wei, X., Li, Q., Zhang, M., Giles-Hansen, K., Liu, W., Fan, H., Wang, Y., Zhou, G., Piao, S., & Liu, S., 2018. Vegetation cover-another dominant factor in determining global water resources in forested regions. *Global Change Biology*, 24(2): 786-795.
- Wickenberg-Bolin, U., Goransson, H., Fryknas, M., Gustafsson, M.G., & Isaksson, A., 2006. Improved variance estimation of classification performance via reduction of bias caused by small sample size. *Bmc Bioinformatics*, 7.
- Xu, T., Guo, Z., Liu, S., He, X., Meng, Y., Xu, Z., Xia, Y., Xiao, J., Zhang, Y., & Ma, Y., 2018. Evaluating Different Machine Learning Methods for Upscaling Evapotranspiration from Flux Towers to the Regional Scale. *Journal of Geophysical Research: Atmospheres*, 123: 8674-8690.
- Yang, D., Shao, W., Yeh, P.J.F., Yang, H., Kanae, S., & Oki, T., 2009. Impact of vegetation coverage on regional water balance in the nonhumid regions of China. *Water Resources Research*, 45: W00A14.
- Yang, D., Sun, F., Liu, Z., Cong, Z., Ni, G., & Lei, Z., 2007. Analyzing spatial and temporal variability of annual water-energy balance in nonhumid regions of China using the Budyko hypothesis. *Water Resources Research*, 43(4): W04426.
- Yang, D.W., Sun, F.B., Liu, Z.T., Cong, Z.T., & Lei, Z.D., 2006. Interpreting the complementary relationship in non-humid environments based on the Budyko and Penman hypotheses. *Geophysical Research Letters*, 33(18): L18402.
- Ye, S., Li, H.-Y., Li, S., Leung, L.R., Demissie, Y., Ran, Q., & Bloeschl, G., 2015. Vegetation regulation on streamflow intra-annual variability through adaption to climate variations. *Geophysical Research Letters*, 42(23): 10307-10315.
- Zeng, R., & Cai, X., 2015. Assessing the temporal variance of evapotranspiration considering climate and catchment storage factors. *Advances in Water Resources*, 79: 51-60.
- Zeng, R., & Cai, X., 2016. Climatic and terrestrial storage control on evapotranspiration temporal variability: Analysis of river basins around the world. *Geophysical Research Letters*, 43(1): 185-195.
- Zha, T., Barr, A.G., van der Kamp, G., Black, T.A., McCaughey, J.H., & Flanagan, L.B., 2010. Interannual variation of evapotranspiration from forest and grassland ecosystems in western Canada in relation to drought. *Agricultural and Forest Meteorology*, 150(11): 1476-1484.
- Zhang, D., Liu, X., Zhang, L., Zhang, Q., Gan, R., & Li, X., 2020. Attribution of Evapotranspiration Changes in Humid Regions of China from 1982 to 2016. *Journal of Geophysical Research-Atmospheres*, 125(13).
- Zhang, D., Liu, X., Zhang, Q., Liang, K., & Liu, C., 2016. Investigation of factors affecting intra-annual variability of evapotranspiration and streamflow under different climate conditions. *Journal of Hydrology*, 543: 759-769.
- Zhang, J., Liu, S., & Ding, Y., 2006. Spatial Variation of Degree-day Factors on the Observed Glaciers in Western China. *Acta Geographica Sinica (in Chinese)*, 61(01): 89-98.
